## Rab GTPases at a glance

Samantha L. Schwartz, Canhong Cao, Olena Pylypenko, Alexey Rak and Angela Wandinger-Ness

Journal of Cell Science 121, 246 (2008) doi:10.1242/jcs.03495

There was an error published in *J. Cell Sci.* **120**, 3905-3910.

The authors regret that in Table 1 under '(13) Rab1, Rab3, Rab8, Rab10, Rab12, Rab13, Rab15, Rab35, Rab40', Rab35 was incorrectly referred to as an uncharacterized member of the Rab family.

The correct details are given below.

| Rab   | Localization                                     | Function                                  | Reference             |
|-------|--------------------------------------------------|-------------------------------------------|-----------------------|
| Rab35 | Plasma membrane, endosomes, intercellular bridge | Rapid endocytic recycling and cytokinesis | Kouranti et al., 2006 |
